# Supplementary material
Source: publisher figshare collection journal article supplement (https://acs.figshare.com/ndownloader/files/8680489)
Supplement: Supplementary file 1 [file 8680489]

## **SUPPORTING INFORMATION**

### **Insight into the Complexity of the i-Motif and G-Quadruplex DNA Structures Formed in the *KRAS* Promoter and Subsequent Drug-Induced Gene Repression**

Christine E. Kaiser, Natalie A. Van Ert, Prashansa Agrawal, Reena Chawla, Danzhou Yang,

Laurence H. Hurley

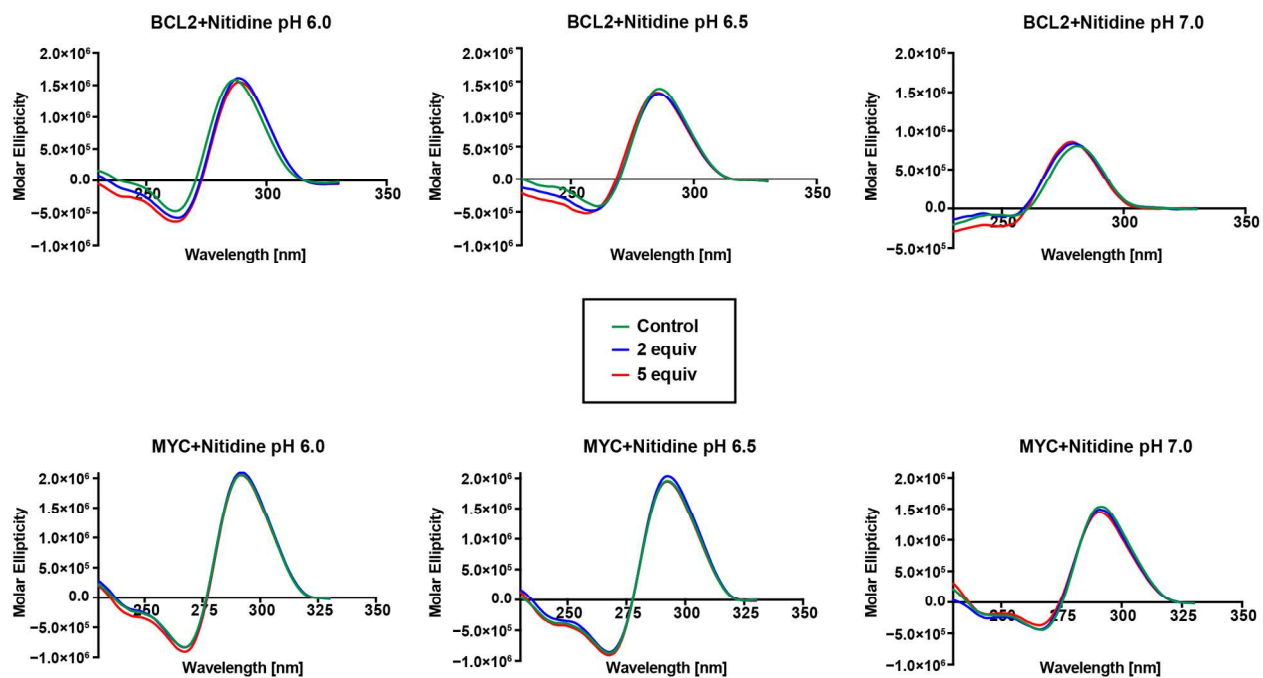

**Figure S1.** CD spectra for BCL2 (top) and c-MYC (bottom) oligomers with varying concentrations of Nitidine at pH 6.0, pH 6.5, and pH 7.0. Conditions were as described in the methods section for the CD experiments with the mid-C region.
